# Supplementary material for: Experimental long-term sub-normothermic machine perfusion for non-allocable human liver grafts: first data towards feasibility
Source: Springer Nature journal article supplement (doi:10.1007/s10353-022-00756-w), 2022-04-27
Supplement: MOESM1 [file 20349080]

## **Experimental sub-normothermic machine perfusion for non-allocable human liver grafts: First data**

Bettina Leber<sup>1</sup>, Stephanie Schlechter<sup>1</sup>, Jennifer Weber<sup>1</sup>, Lisa Rohrhofer<sup>1</sup>, Tobias Niedrist<sup>3</sup>, Ariane Aigelsreiter<sup>2</sup>, Philipp Stiegler<sup>1\*</sup>, Peter Schemmer<sup>1</sup>

<sup>1</sup>General, Visceral and Transplant Surgery, Department of Surgery, Medical University of Graz, Auenbruggerplatz 2, 8036 Graz, Austria

<sup>2</sup>Diagnostic and Research Institute of Pathology, Medical University of Graz, Neue Stiftingtalstraße 6, 8010 Graz, Austria

<sup>3</sup>Clinical Institute of Medical and Chemical Laboratory Diagnostics, Medical University of Graz, Auenbruggerplatz 15, 8036 Graz, Austria

\*Correspondence: philipp.stiegler@medunigraz.at; Tel.: +43 316 385 81181

Table S1 Liver parameters in perfusate prior to onset of SNMP (SCS), after 1h of SNMP and after 24 hours of SNMP.

| Organ No. | AP (U/l) |    |     | GGT (U/l) |    |     | ALT (U/l) |      |      | AST (U/l) |      |      | LDH (U/l) |      |      | LAC (mmol/l) |       |       |
|-----------|----------|----|-----|-----------|----|-----|-----------|------|------|-----------|------|------|-----------|------|------|--------------|-------|-------|
|           | SCS      | 1h | 24h | SCS       | 1h | 24h | SCS       | 1h   | 24h  | SCS       | 1h   | 24h  | SCS       | 1h   | 24h  | SCS          | 1h    | 24h   |
| L1        | 75       | 7  | 22  | 19        | 3  | 18  | 3328      | 919  | 1438 | 3716      | 945  | 2145 | 7660      | 2185 | 3482 | 8.14         | 3.83  | 3.05  |
| L2        | 1        | 1  | 9   | 0         | 0  | 7   | 24        | 60   | 333  | 83        | 117  | 603  | 112       | 255  | 1085 | 1.32         | 2.40  | 13.89 |
| L3        | 16       | 18 | 57  | 4         | 4  | 58  | 1445      | 2115 | 3385 | 2612      | 3546 | 7492 | 4039      | 5358 | 8501 | 3.82         | 6.33  | 11.51 |
| L4        | 25       | 11 | 47  | 4         | 2  | 28  | 6075      | 1697 | 2204 | 4883      | 1426 | 2430 | 9074      | 2989 | 3783 | 5.26         | 6.85  | 16.87 |
| L5        | 11       | 1  | 13  | 0.7       | 0  | 6   | 267       | 164  | 318  | 364       | 180  | 407  | 658       | 325  | 662  | 3.17         | 4.72  | 4.97  |
| L6        | 17       | 5  | 15  | 1         | 1  | 9   | 325       | 65   | 1090 | 291       | 54   | 2369 | 762       | 178  | 2184 | 4.47         | 2.95  | 4.24  |
| L7        | 52       | 7  | 11  | 5.5       | 0  | 7   | 813       | 109  | 351  | 1860      | 204  | 696  | 3208      | 399  | 1255 | 10.89        | 4.65  | 21.02 |
| L8        | 66       | 2  | 4.2 | 52        | 5  | 23  | 17190     | 2645 | 1644 | 18497     | 2734 | 2636 | 32975     | 6344 | 4442 | 8.89         | 3.91  | 6.26  |
| L9        | 8.9      | 2  | 3.5 | 1.4       | 1  | 4   | 398       | 84   | 473  | 499       | 120  | 709  | 868       | 231  | 1046 | 6.57         | 3.51  | 8.05  |
| L10       | 13       | 2  | 3   | 2.7       | 1  | 2   | 531       | 128  | 203  | 471       | 138  | 231  | 1064      | 271  | 426  | 4.99         | 2.47  | 6.02  |
| L11       | 16       | 2  | 4.1 | 2.3       | 2  | 7   | 69        | 123  | 233  | 173       | 244  | 463  | 407       | 448  | 797  | 2.93         | 6.59  | 32.21 |
| L12       | 46       | 1  | 7.1 | 14        | 0  | 7   | 743       | 54   | 151  | 1319      | 146  | 351  | 2469      | 252  | 564  | 13.95        | 8.04  | 3.77  |
| L13       | 59       | 3  | 6.7 | 18        | 5  | 11  | 2056      | 1073 | 789  | 5589      | 2598 | 2383 | 6462      | 3337 | 2637 | 8.98         | 3.73  | 3.18  |
| L14       | nm       | 0  | 5   | nm        | 0  | 3   | nm        | 192  | 279  | nm        | 465  | 723  | nm        | 685  | 1131 | nm           | 2.71  | 0.60  |
| L15       | 233      | 1  | 19  | 44        | 2  | 21  | 6020      | 463  | 472  | 8000      | 774  | 838  | 11000     | 1579 | 1642 | 11.71        | 4.21  | 3.55  |
| L16       | 51       | 16 | 33  | 27        | 13 | 43  | 4472      | 1974 | 1731 | 5039      | 2098 | 1993 | 8455      | 4047 | 3553 | 6.91         | 11.00 | 28.10 |

nm: not measurable

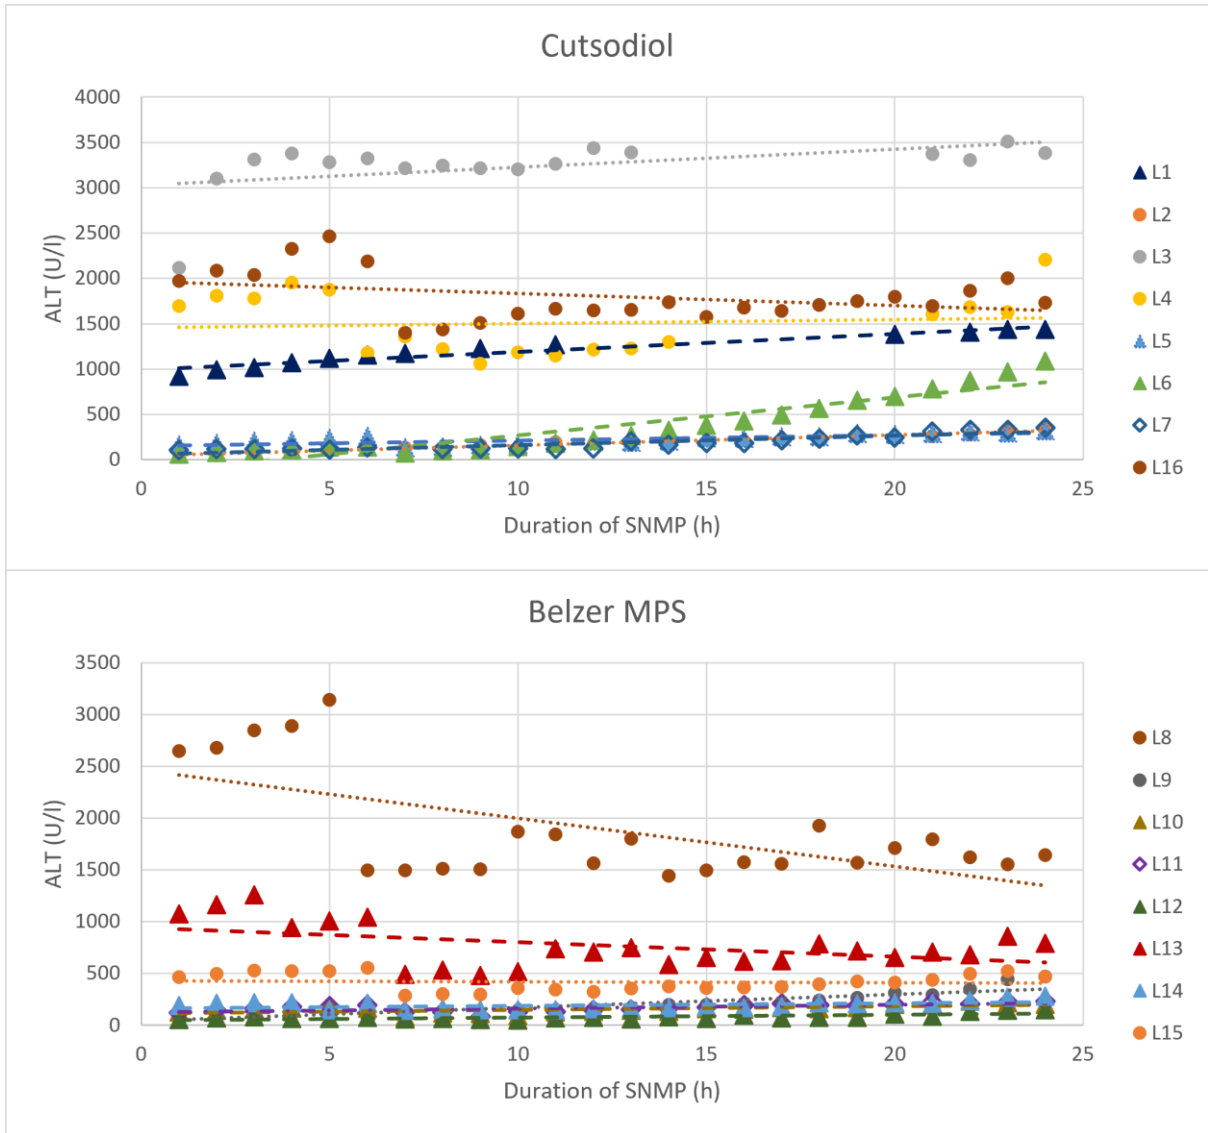

Figure S1 ALT levels of livers subjected to sub-normothermic machine perfusion grouped by Perfusate used. Dots: Steatotic livers; Open Diamonds: Cirrhotic livers; Triangles: Livers rejected for other reasons. Lines represent linear fit for respective data set.

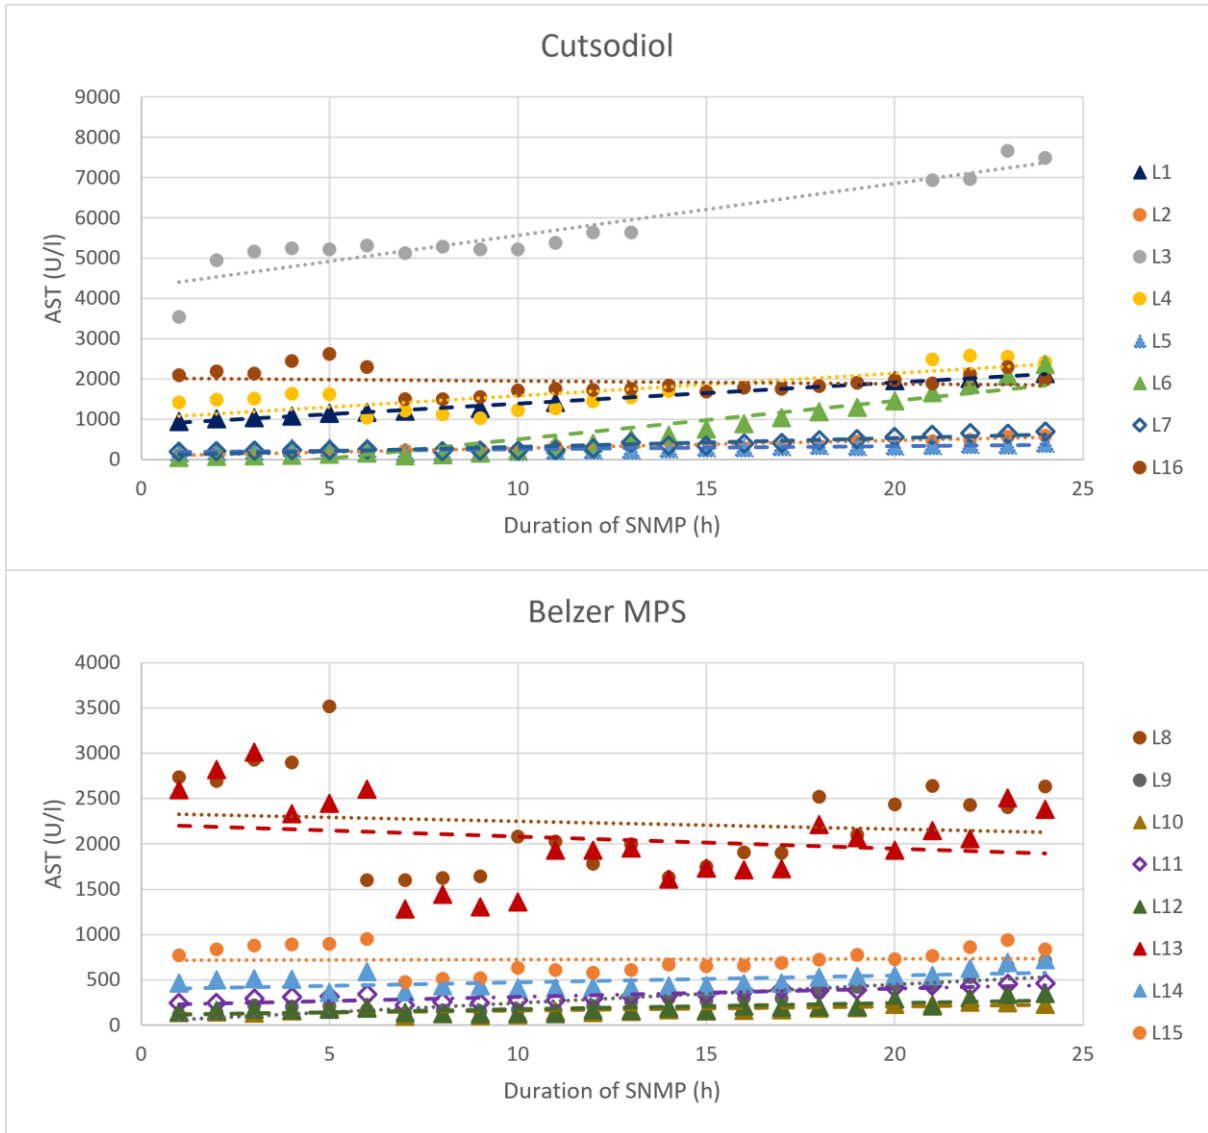

Figure S2 AST levels of livers subjected to sub-normothermic machine perfusion grouped by Perfusate used. Dots: Steatotic livers; Open Diamonds: Cirrhotic livers; Triangles: Livers rejected for other reasons. Lines represent linear fit for respective data set.

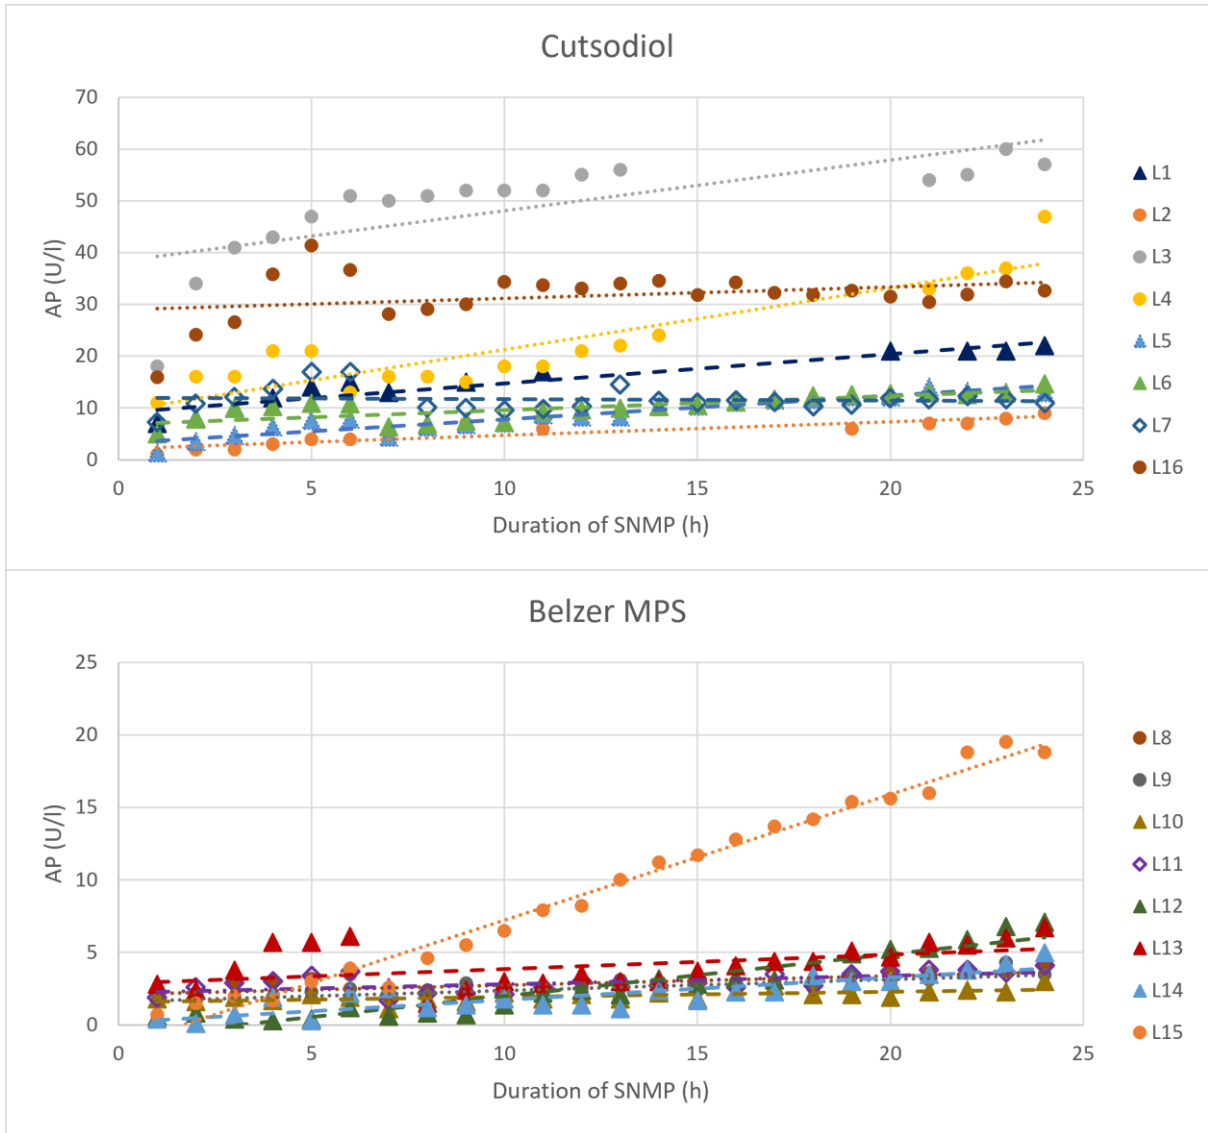

Figure S3 AP levels of livers subjected to sub-normothermic machine perfusion grouped by Perfusate used. Dots: Steatotic livers; Open Diamonds: Cirrhotic livers; Triangles: Livers rejected for other reasons. Lines represent linear fit for respective data set.

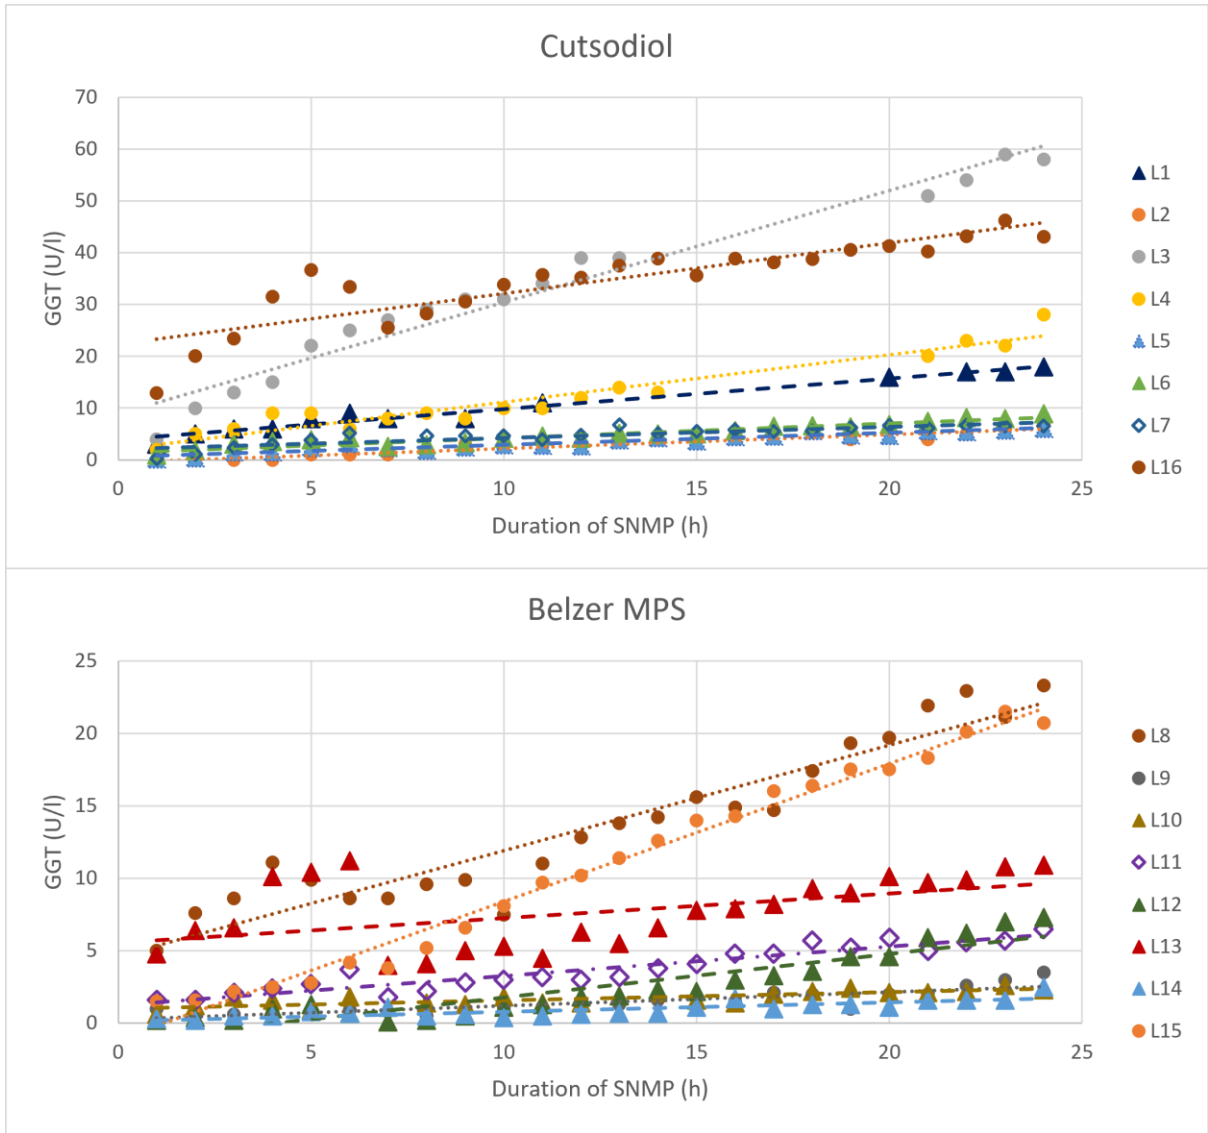

Figure S4 GGT levels of livers subjected to sub-normothermic machine perfusion grouped by Perfusate used. Dots: Steatotic livers; Open Diamonds: Cirrhotic livers; Triangles: Livers rejected for other reasons. Lines represent linear fit for respective data set.

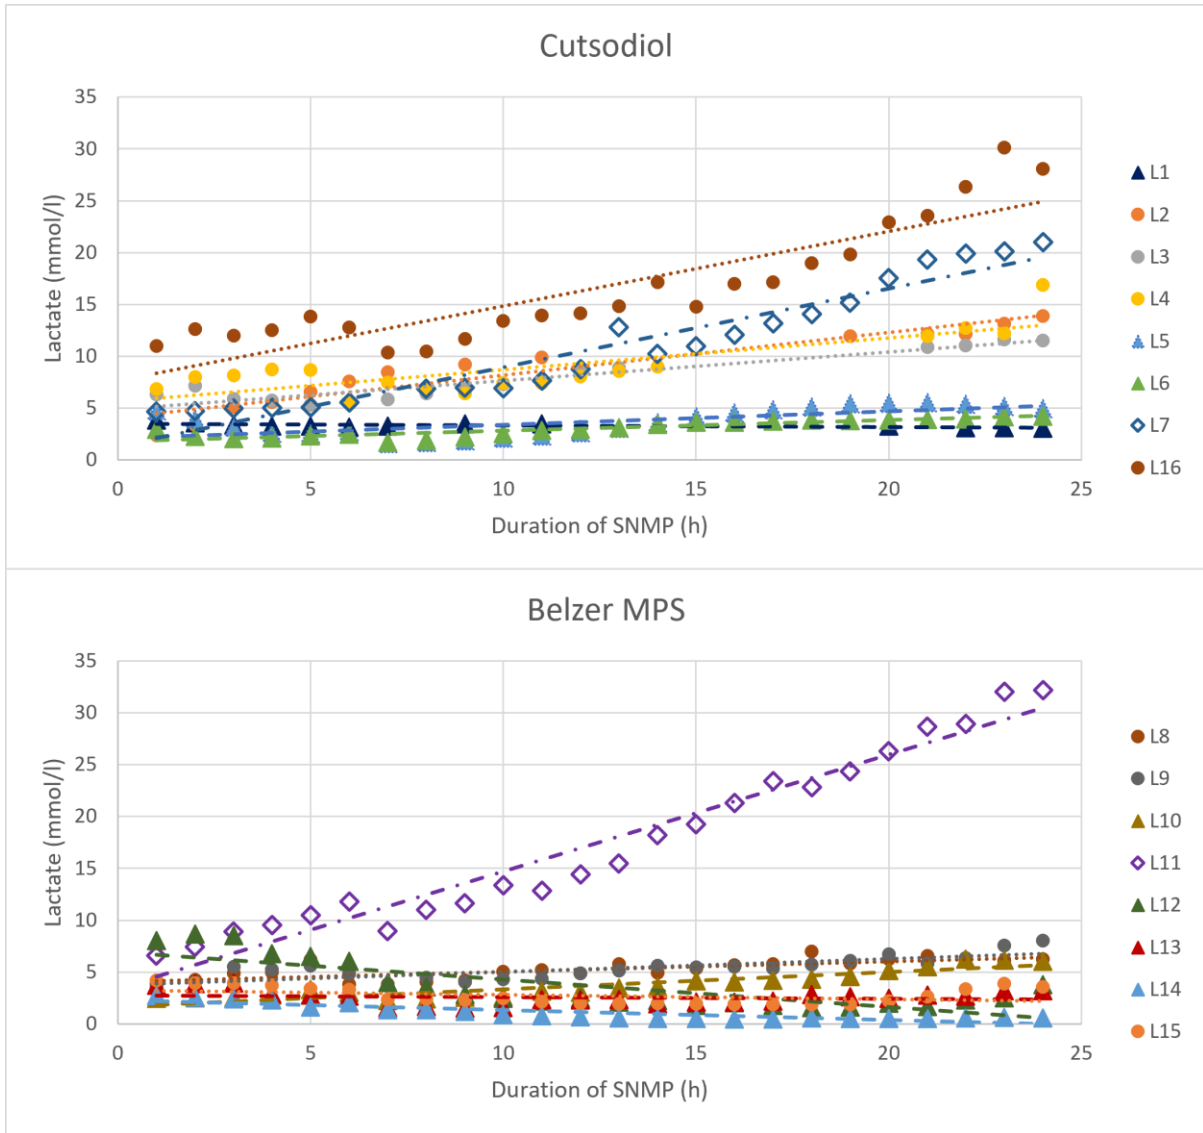

Figure S5 Lactate levels of livers subjected to sub-normothermic machine perfusion grouped by Perfusate used. Dots: Steatotic livers; Open Diamonds: Cirrhotic livers; Triangles: Livers rejected for other reasons. Lines represent linear fit for respective data set.

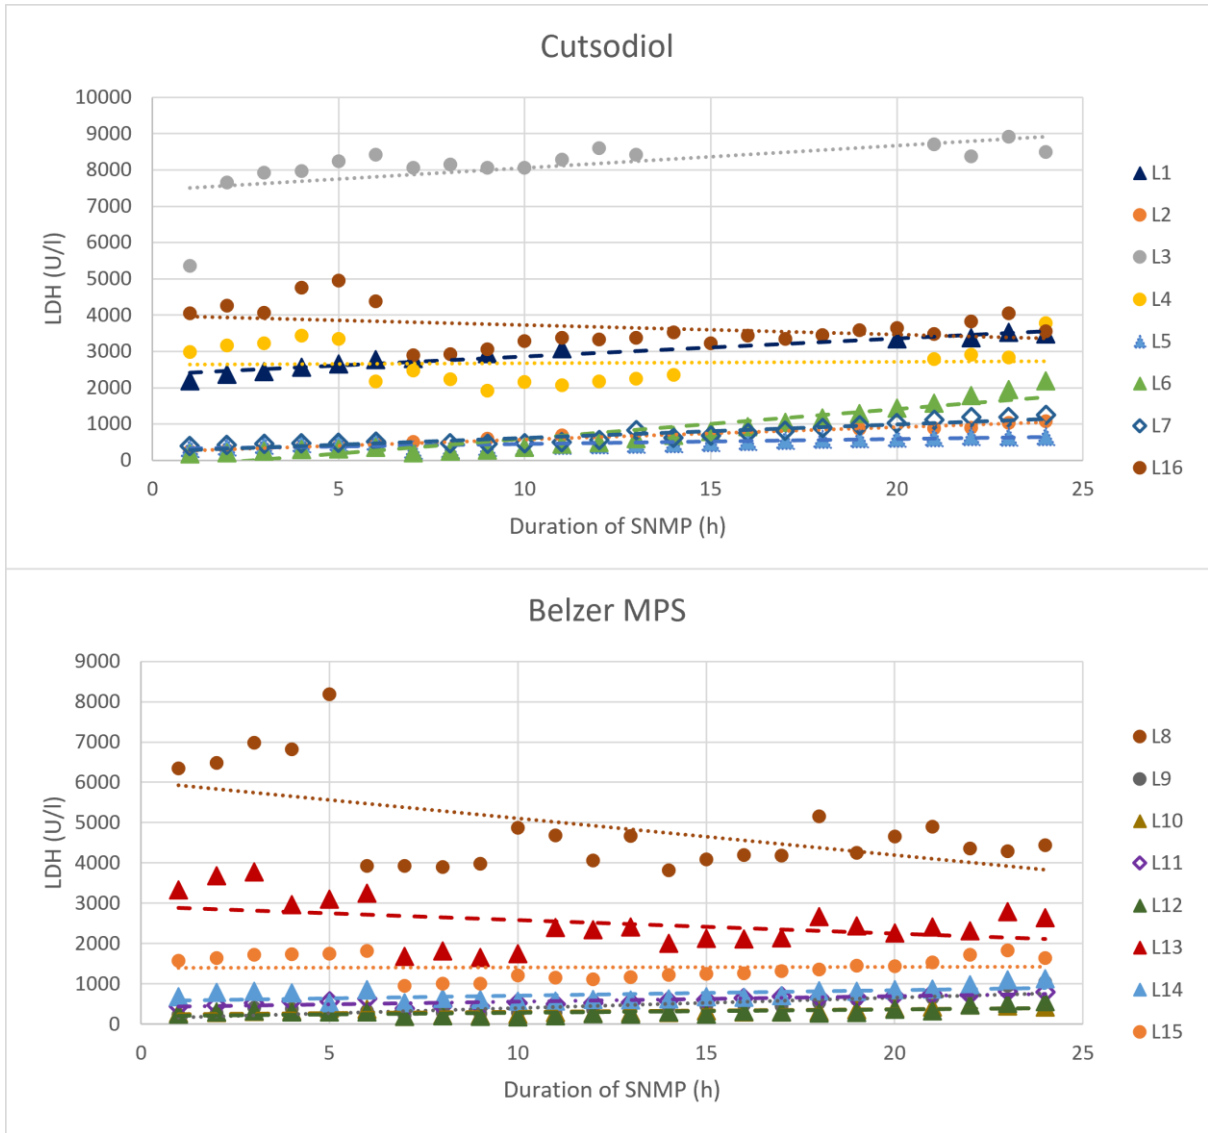

Figure S6 LDH levels of livers subjected to sub-normothermic machine perfusion grouped by Perfusate used. Dots: Steatotic livers; Open Diamonds: Cirrhotic livers; Triangles: Livers rejected for other reasons. Lines represent linear fit for respective data set.
